# Supplementary material for: Impact of elevated left ventricular filling pressure on long-term outcomes after transcatheter aortic valve replacement
Source: HighWire-hosted journal article supplement (doi:10.1136/openhrt-2022-002015), 2022-06-01
Supplement: openhrt-2022-002015supp001_data_supplement.pdf [file openhrt-2022-002015supp001_data_supplement.pdf]

**Supplementary tables:****Table 1: Multivariable Analysis of Overall Survival by Cox Regression, Adjusted for Afib**

| Variable                                          | Multivariate analysis |         |
|---------------------------------------------------|-----------------------|---------|
|                                                   | Hazard ratio (95% CI) | P value |
| Dyslipidemia                                      | 0.751 (0.577-0.978)   | 0.034   |
| Hypertension                                      | 0.618 (0.412-0.926)   | 0.020   |
| Prior PCI                                         | 1.359 (1.065-1.735)   | 0.006   |
| Presence of Pacemaker/Defibrillator prior to TAVR | 1.208 (0.867-1.684)   | 0.264   |
| Elevated Filling Pressure                         | 1.303 (1.024-1.657)   | 0.031   |
